# Supplementary material for: Effect of a Laminarin Rich Macroalgal Extract on the Caecal and Colonic Microbiota in the Post-Weaned Pig
Source: PubMed Central journal article supplement (PMC7143854; doi:10.3390/md18030157), 2020-03-11
Supplement: marinedrugs-18-00157-s001.pdf [file marinedrugs-18-00157-s001.pdf]

**Table S1. Differential abundance analysis of the 20 significant OTUS from the caecum of pigs fed either a control or laminarin supplemented diet**

| OTU                  | baseMean | log2FoldChange | lfcSE | pvalue | padj  | Phylum         | Family             | Genus         | Species |
|----------------------|----------|----------------|-------|--------|-------|----------------|--------------------|---------------|---------|
| New.ReferenceOTU3159 | 19.28    | 4.93           | 1.40  | 0.000  | 0.039 | Bacteroidetes  | S24-7              | NA            | NA      |
| 1652947              | 8.88     | 4.17           | 1.26  | 0.001  | 0.049 | Bacteroidetes  | S24-7              | NA            | NA      |
| 36031                | 156.60   | 25.47          | 2.96  | 0.000  | 0.000 | Bacteroidetes  | Prevotellaceae     | Prevotella    | NA      |
| 299882               | 17.09    | 20.42          | 2.97  | 0.000  | 0.000 | Bacteroidetes  | Prevotellaceae     | Prevotella    | NA      |
| 4397200              | 128.78   | 11.04          | 2.96  | 0.000  | 0.026 | Bacteroidetes  | Prevotellaceae     | Prevotella    | NA      |
| 264552               | 127.62   | 11.41          | 2.96  | 0.000  | 0.019 | Firmicutes     | Veillonellaceae    | Dialister     | NA      |
| 640999               | 17.49    | 4.56           | 1.15  | 0.000  | 0.015 | Firmicutes     | NA                 | NA            | NA      |
| 355697               | 57.58    | -6.41          | 1.74  | 0.000  | 0.026 | Firmicutes     | Lachnospiraceae    | NA            | NA      |
| 47477                | 30.94    | -6.23          | 1.75  | 0.000  | 0.037 | Firmicutes     | Lachnospiraceae    | NA            | NA      |
| New.ReferenceOTU1338 | 55.19    | -4.74          | 1.45  | 0.001  | 0.049 | Firmicutes     | Lachnospiraceae    | NA            | NA      |
| New.ReferenceOTU375  | 19.51    | -5.71          | 1.76  | 0.001  | 0.049 | Firmicutes     | NA                 | NA            | NA      |
| 4322752              | 4.24     | 3.91           | 1.20  | 0.001  | 0.049 | Firmicutes     | NA                 | NA            | NA      |
| 392918               | 60.90    | 4.25           | 1.29  | 0.001  | 0.049 | Firmicutes     | Ruminococcaceae    | NA            | NA      |
| 362078               | 128.72   | 2.99           | 0.93  | 0.001  | 0.049 | Firmicutes     | Ruminococcaceae    | NA            | NA      |
| 302158               | 8.19     | -4.63          | 1.41  | 0.001  | 0.049 | Proteobacteria | Campylobacteraceae | Campylobacter | NA      |
| 1111294              | 3788.40  | -4.35          | 1.26  | 0.001  | 0.044 | Proteobacteria | Enterobacteriaceae | NA            | NA      |
| 797229               | 31.92    | -4.42          | 1.34  | 0.001  | 0.049 | Proteobacteria | Enterobacteriaceae | NA            | NA      |
| New.ReferenceOTU968  | 20.73    | -23.42         | 2.71  | 0.000  | 0.000 | Spirochaetes   | Spirochaetaceae    | Treponema     | NA      |
| 924224               | 85.85    | -5.76          | 1.78  | 0.001  | 0.049 | Spirochaetes   | Spirochaetaceae    | Treponema     | NA      |
| New.ReferenceOTU282  | 7.77     | -4.35          | 1.29  | 0.001  | 0.049 | Spirochaetes   | Spirochaetaceae    | Treponema     | NA      |

**Table S2. Differential abundance analysis of all measured microbial populations from caecal digesta of pigs fed either a control or laminarin supplemented diet**

|                              | OTU                            | Control | Lam   | SEM  | padj  |
|------------------------------|--------------------------------|---------|-------|------|-------|
| <b>Phylum</b>                |                                |         |       |      |       |
| Deferribacteres              | 4374042                        | 0.21    | 0.08  | 0.09 | 0.620 |
| Proteobacteria               | 113756                         | 19.44   | 11.92 | 4.12 | 0.620 |
| Bacteroidetes                | 568118                         | 50.84   | 60.71 | 4.79 | 0.620 |
| Firmicutes                   | New.CleanUp.ReferenceOTU122441 | 27.56   | 25.78 | 3.71 | 0.788 |
| Actinobacteria               | 288683                         | 0.07    | 0.10  | 0.02 | 0.788 |
| Fibrobacteres                | New.ReferenceOTU3654           | 0.04    | 0.06  | 0.03 | 0.788 |
| Spirochaetes                 | 68837                          | 1.53    | 1.25  | 0.71 | 0.788 |
| Fusobacteria                 | 572889                         | 0.20    | 0.00  | 0.09 | 0.873 |
| Tenericutes                  | 178759                         | 0.10    | 0.10  | 0.05 | 0.873 |
| <b>Family</b>                |                                |         |       |      |       |
| <i>Coriobacteriaceae</i>     | 288683                         | 0.07    | 0.11  | 0.02 | 0.692 |
| <i>RF16</i>                  | New.ReferenceOTU3588           | 0.42    | 0.08  | 0.20 | 0.133 |
| <i>Prevotellaceae</i>        | 568118                         | 35.92   | 45.38 | 6.34 | 0.313 |
| <i>Paraprevotellaceae</i>    | 20534                          | 11.79   | 13.03 | 1.91 | 0.369 |
| <i>S24-7</i>                 | 577228                         | 1.16    | 2.08  | 0.42 | 0.372 |
| <i>Odoribacteraceae</i>      | 4307122                        | 0.00    | 0.03  | 0.01 | 0.522 |
| <i>Porphyromonadaceae</i>    | 921813                         | 0.63    | 0.35  | 0.26 | 0.577 |
| <i>p-2534-18B5</i>           | 16915                          | 0.07    | 0.22  | 0.09 | 0.577 |
| <i>BS11</i>                  | New.ReferenceOTU2170           | 0.04    | 0.01  | 0.02 | 0.801 |
| <i>Bacteroidaceae</i>        | New.ReferenceOTU2302           | 1.51    | 0.13  | 0.68 | 0.980 |
| <i>Deferribacteraceae</i>    | 4374042                        | 0.23    | 0.09  | 0.09 | 0.522 |
| <i>Fibrobacteraceae</i>      | New.ReferenceOTU3654           | 0.05    | 0.07  | 0.03 | 0.961 |
| <i>Streptococcaceae</i>      | 349024                         | 0.06    | 0.02  | 0.03 | 0.372 |
| <i>Peptococcaceae</i>        | New.ReferenceOTU2707           | 0.02    | 0.01  | 0.00 | 0.522 |
| <i>Clostridiaceae</i>        | 215963                         | 0.73    | 0.63  | 0.23 | 0.801 |
| <i>Ruminococcaceae</i>       | 851865                         | 7.27    | 10.37 | 1.87 | 0.801 |
| <i>Christensenellaceae</i>   | 644244                         | 0.02    | 0.05  | 0.02 | 0.961 |
| <i>Peptostreptococcaceae</i> | 712677                         | 0.02    | 0.03  | 0.01 | 0.961 |
| <i>Lachnospiraceae</i>       | New.CleanUp.ReferenceOTU122441 | 12.76   | 10.09 | 2.27 | 0.980 |
| <i>Veillonellaceae</i>       | 510572                         | 2.20    | 1.25  | 0.53 | 0.980 |
| <i>[Mogibacteriaceae]</i>    | 187517                         | 0.09    | 0.12  | 0.04 | 0.980 |
| <i>Lactobacillaceae</i>      | 302975                         | 3.11    | 2.13  | 1.12 | 0.980 |
| <i>Turicibacteraceae</i>     | 368490                         | 0.19    | 0.05  | 0.09 | 0.980 |
| <i>Fusobacteriaceae</i>      | 572889                         | 0.24    | 0.00  | 0.11 | 0.980 |
| <i>Enterobacteriaceae</i>    | 1111294                        | 4.85    | 0.35  | 1.20 | 0.011 |
| <i>Alcaligenaceae</i>        | 333380                         | 0.15    | 0.06  | 0.03 | 0.243 |
| <i>Helicobacteraceae</i>     | 548699                         | 0.17    | 0.04  | 0.06 | 0.369 |
| <i>Desulfovibrionaceae</i>   | 30569                          | 0.10    | 0.26  | 0.07 | 0.372 |

|                              |                                |       |       |      |       |
|------------------------------|--------------------------------|-------|-------|------|-------|
| <i>Oxalobacteraceae</i>      | 360508                         | 0.00  | 0.01  | 0.00 | 0.719 |
| <i>Pasteurellaceae</i>       | 359779                         | 1.40  | 0.83  | 0.73 | 0.808 |
| <i>Campylobacteraceae</i>    | 113756                         | 11.39 | 9.88  | 3.44 | 0.961 |
| <i>Succinivibrionaceae</i>   | 163857                         | 1.59  | 0.82  | 0.79 | 0.980 |
| <i>Spirochaetaceae</i>       | 68837                          | 1.68  | 1.42  | 0.79 | 0.980 |
| <i>Anaeroplasmataceae</i>    | 185593                         | 0.11  | 0.01  | 0.03 | 0.980 |
| <b>Genus</b>                 |                                |       |       |      |       |
| <i>Collinsella</i>           | 363794                         | 0.03  | 0.04  | 0.01 | 0.791 |
| <i>Odoribacter</i>           | 4307122                        | 0.00  | 0.04  | 0.02 | 0.762 |
| <i>Prevotella</i>            | 20534                          | 11.99 | 13.22 | 2.14 | 0.791 |
| YRC22                        | 4435235                        | 0.36  | 0.84  | 0.41 | 0.932 |
| CF231                        | 300853                         | 1.88  | 1.60  | 0.53 | 0.932 |
| <i>Bacteroides</i>           | New.ReferenceOTU2302           | 1.95  | 0.17  | 0.89 | 0.932 |
| <i>Parabacteroides</i>       | 921813                         | 0.79  | 0.45  | 0.33 | 0.668 |
| <i>Paludibacter</i>          | New.ReferenceOTU1695           | 0.00  | 0.00  | 0.00 | 0.932 |
| <i>Prevotella</i>            | 568118                         | 42.75 | 51.58 | 6.66 | 0.091 |
| <i>Mucispirillum</i>         | 4374042                        | 0.27  | 0.10  | 0.11 | 0.791 |
| <i>Fibrobacter</i>           | New.ReferenceOTU3654           | 0.05  | 0.09  | 0.04 | 0.932 |
| <i>Anaerovorax</i>           | 1112364                        | 0.05  | 0.00  | 0.02 | 0.228 |
| <i>Clostridium</i>           | 215963                         | 0.41  | 0.30  | 0.14 | 0.932 |
| <i>Dorea</i>                 | 1076587                        | 0.09  | 0.15  | 0.04 | 0.629 |
| <i>Blautia</i>               | 532203                         | 0.12  | 0.17  | 0.05 | 0.682 |
| <i>Roseburia</i>             | New.CleanUp.ReferenceOTU122441 | 5.23  | 3.32  | 1.65 | 0.932 |
| <i>Lachnospira</i>           | 1029949                        | 0.94  | 0.65  | 0.27 | 0.932 |
| <i>Coproccoccus</i>          | 344804                         | 0.68  | 0.73  | 0.23 | 0.932 |
| <i>Butyrivibrio</i>          | 4364564                        | 0.08  | 0.01  | 0.03 | 0.932 |
| <i>Epulopiscium</i>          | New.ReferenceOTU2736           | 0.03  | 0.01  | 0.02 | 0.932 |
| <i>Ruminococcus</i>          | 1111191                        | 0.05  | 0.01  | 0.02 | 0.932 |
| <i>Anaerostipes</i>          | 846386                         | 0.01  | 0.02  | 0.01 | 0.932 |
| <i>Lactobacillus</i>         | 302975                         | 3.71  | 2.71  | 1.45 | 0.932 |
| rc4-4                        | New.ReferenceOTU2707           | 0.02  | 0.01  | 0.01 | 0.629 |
| <i>Ruminococcus</i>          | 369602                         | 0.35  | 0.47  | 0.11 | 0.614 |
| <i>Faecalibacterium</i>      | 851865                         | 3.31  | 3.79  | 1.17 | 0.932 |
| <i>Oscillospira</i>          | 310886                         | 1.87  | 1.74  | 0.31 | 0.932 |
| <i>Streptococcus</i>         | 349024                         | 0.07  | 0.02  | 0.03 | 0.613 |
| <i>Turicibacter</i>          | 368490                         | 0.21  | 0.06  | 0.10 | 0.738 |
| <i>Dialister</i>             | 264552                         | 0.00  | 0.39  | 0.12 | 0.048 |
| <i>Acidaminococcus</i>       | 25947                          | 0.00  | 0.02  | 0.00 | 0.228 |
| <i>Anaerovibrio</i>          | 510572                         | 2.44  | 0.83  | 0.60 | 0.228 |
| <i>Megasphaera</i>           | 266210                         | 0.05  | 0.10  | 0.05 | 0.825 |
| <i>Phascolarctobacterium</i> | 916143                         | 0.05  | 0.04  | 0.01 | 0.932 |
| <i>Mitsuokella</i>           | 149335                         | 0.08  | 0.08  | 0.04 | 0.932 |
| <i>Fusobacterium</i>         | 572889                         | 0.31  | 0.00  | 0.14 | 0.932 |
| <i>Sutterella</i>            | 333380                         | 0.18  | 0.08  | 0.03 | 0.435 |
| <i>Campylobacter</i>         | 113756                         | 14.02 | 12.05 | 4.34 | 0.932 |
| <i>Desulfovibrio</i>         | 30569                          | 0.08  | 0.32  | 0.08 | 0.613 |

|                                     |                               |       |       |      |       |
|-------------------------------------|-------------------------------|-------|-------|------|-------|
| <i>Helicobacter</i>                 | 311173                        | 0.06  | 0.05  | 0.02 | 0.932 |
| <i>Oxalobacter</i>                  | 360508                        | 0.00  | 0.01  | 0.00 | 0.791 |
| <i>Aggregatibacter</i>              | 9498                          | 0.06  | 0.01  | 0.03 | 0.614 |
| <i>Actinobacillus</i>               | 359779                        | 1.51  | 0.98  | 0.80 | 0.932 |
| <i>Anaerobiospirillum</i>           | 587570                        | 0.03  | 0.06  | 0.03 | 0.791 |
| <i>Succinivibrio</i>                | 163857                        | 1.80  | 0.84  | 0.88 | 0.791 |
| <i>Treponema</i>                    | 68837                         | 1.98  | 1.83  | 0.98 | 0.932 |
| <i>Anaeroplasma</i>                 | New.ReferenceOTU3606          | 0.04  | 0.00  | 0.02 | 0.762 |
| <b>Species</b>                      |                               |       |       |      |       |
| <i>Lactobacillus mucosae</i>        | New.ReferenceOTU3048          | 0.05  | 0.07  | 0.05 | 0.780 |
| <i>Streptococcus luteciae</i>       | 349024                        | 0.13  | 0.05  | 0.07 | 0.780 |
| <i>Bacteroides plebeius</i>         | 365496                        | 0.18  | 0.03  | 0.09 | 0.780 |
| <i>Prevotella stercorea</i>         | 591785                        | 21.93 | 20.79 | 3.15 | 0.807 |
| <i>Prevotella copri</i>             | 568118                        | 64.56 | 61.44 | 5.64 | 0.893 |
| <i>Oxalobacter formigenes</i>       | 360508                        | 0.01  | 0.14  | 0.07 | 0.780 |
| <i>Ruminococcus gnavus</i>          | 1111191                       | 0.11  | 0.02  | 0.05 | 0.780 |
| <i>Coprococcus eutactus</i>         | 362501                        | 0.02  | 0.01  | 0.01 | 0.893 |
| <i>Dorea formicigenerans</i>        | 1076587                       | 0.09  | 0.28  | 0.11 | 0.807 |
| <i>Faecalibacterium prausnitzii</i> | 851865                        | 11.55 | 15.65 | 4.81 | 0.780 |
| <i>Mitsuokella multacida</i>        | 149335                        | 0.17  | 0.13  | 0.07 | 0.893 |
| <i>Roseburia faecis</i>             | New.CleanUp.ReferenceOTU17239 | 0.07  | 0.03  | 0.02 | 0.807 |
| <i>Ruminococcus bromii</i>          | 369602                        | 0.16  | 0.71  | 0.27 | 0.301 |
| <i>Ruminococcus flavofaciens</i>    | New.ReferenceOTU3836          | 0.09  | 0.04  | 0.05 | 0.780 |
| <i>Collinsella aerofaciens</i>      | 363794                        | 0.07  | 0.13  | 0.03 | 0.780 |
| <i>Mucispirillum schaedleri</i>     | 4374042                       | 0.79  | 0.30  | 0.32 | 0.780 |
| <i>Fibrobacter succinogenes</i>     | 638485                        | 0.02  | 0.19  | 0.09 | 0.780 |

---

**Table S3. Differential abundance analysis of the 3 significant OTUS from the colon pigs fed either a control or laminarin supplemented diet**

| OTU                  | baseMean | log2FoldChange | lfcSE | pvalue  | padj    | Kingdom  | Phylum         | Family          | Genus      | Species |
|----------------------|----------|----------------|-------|---------|---------|----------|----------------|-----------------|------------|---------|
| New.ReferenceOTU968  | 85.12    | -25.08         | -9.13 | 6.8E-20 | 6.4E-17 | Bacteria | Spirochaetales | Spirochaetaceae | Treponema  | NA      |
| 879327               | 17.97    | -23.40         | -8.67 | 4.3E-18 | 2.0E-15 | Bacteria | Clostridiales  | NA              | NA         | NA      |
| New.ReferenceOTU1384 | 201.24   | 6.30           | 4.05  | 5.1E-05 | 1.6E-02 | Bacteria | Bacteroidales  | Prevotellaceae  | Prevotella | copri   |

**Table S4. Differential abundance analysis of all measured microbial populations in the colonic digesta from pigs fed either a control or laminarin supplemented diet**

|                              | Control | Laminarin | SEM  | padj  |
|------------------------------|---------|-----------|------|-------|
| <b>Phylum</b>                |         |           |      |       |
| Actinobacteria               | 0.10    | 0.19      | 0.04 | 0.655 |
| Spirochaetes                 | 2.79    | 2.47      | 0.80 | 0.655 |
| Deferribacteres              | 0.69    | 0.31      | 0.26 | 0.655 |
| Proteobacteria               | 12.79   | 7.56      | 3.10 | 0.655 |
| Bacteroidetes                | 52.09   | 50.24     | 4.06 | 0.655 |
| Fibrobacteres                | 0.10    | 0.12      | 0.04 | 0.826 |
| Fusobacteria                 | 0.35    | 0.00      | 0.17 | 0.826 |
| Firmicutes                   | 30.88   | 38.82     | 4.63 | 0.826 |
| Tenericutes                  | 0.20    | 0.29      | 0.08 | 0.931 |
| <b>Family</b>                |         |           |      |       |
| <i>Coriobacteriaceae</i>     | 0.11    | 0.22      | 0.04 | 0.672 |
| <i>p-2534-18B5</i>           | 1.15    | 0.10      | 0.33 | 0.033 |
| <i>Porphyromonadaceae</i>    | 1.21    | 0.64      | 0.30 | 0.357 |
| <i>BS11</i>                  | 0.21    | 0.02      | 0.06 | 0.359 |
| <i>S24-7</i>                 | 2.73    | 4.44      | 1.03 | 0.603 |
| <i>Prevotellaceae</i>        | 30.35   | 33.43     | 5.03 | 0.708 |
| <i>[Odoribacteraceae]</i>    | 0.00    | 0.03      | 0.01 | 0.741 |
| <i>[Paraprevotellaceae]</i>  | 13.77   | 11.38     | 1.46 | 0.765 |
| <i>RF16</i>                  | 0.88    | 0.18      | 0.37 | 0.971 |
| <i>Bacteroidaceae</i>        | 2.53    | 0.30      | 1.12 | 0.981 |
| <i>Deferribacteraceae</i>    | 0.83    | 0.34      | 0.31 | 0.825 |
| <i>Fibrobacteraceae</i>      | 0.12    | 0.13      | 0.05 | 0.971 |
| <i>Christensenellaceae</i>   | 1.72    | 0.82      | 0.77 | 0.197 |
| <i>Lachnospiraceae</i>       | 12.99   | 13.45     | 1.89 | 0.603 |
| <i>Ruminococcaceae</i>       | 11.49   | 18.45     | 3.01 | 0.603 |
| <i>Veillonellaceae</i>       | 1.12    | 1.10      | 0.30 | 0.741 |
| <i>Mogibacteriaceae</i>      | 0.22    | 0.19      | 0.07 | 0.848 |
| <i>Clostridiaceae</i>        | 1.02    | 1.22      | 0.30 | 0.858 |
| <i>Peptostreptococcaceae</i> | 0.02    | 0.03      | 0.02 | 0.955 |
| <i>Peptococcaceae</i>        | 0.04    | 0.04      | 0.01 | 0.971 |
| <i>Lactobacillaceae</i>      | 1.79    | 2.77      | 0.55 | 0.708 |
| <i>Streptococcaceae</i>      | 0.03    | 0.02      | 0.02 | 0.808 |

|                            |       |       |      |       |
|----------------------------|-------|-------|------|-------|
| <i>Turicibacteraceae</i>   | 0.05  | 0.04  | 0.03 | 0.765 |
| <i>Fusobacteriaceae</i>    | 0.41  | 0.00  | 0.19 | 0.848 |
| <i>Succinivibrionaceae</i> | 0.59  | 0.49  | 0.33 | 0.765 |
| <i>Alcaligenaceae</i>      | 0.16  | 0.24  | 0.05 | 0.708 |
| <i>Oxalobacteraceae</i>    | 0.02  | 0.02  | 0.01 | 0.825 |
| <i>Helicobacteraceae</i>   | 1.23  | 0.28  | 0.55 | 0.305 |
| <i>Campylobacteraceae</i>  | 5.61  | 4.72  | 1.99 | 0.708 |
| <i>Desulfovibrionaceae</i> | 0.35  | 0.37  | 0.11 | 0.971 |
| <i>Enterobacteriaceae</i>  | 3.73  | 0.38  | 0.95 | 0.305 |
| <i>Pasteurellaceae</i>     | 0.06  | 1.16  | 0.50 | 0.858 |
| <i>Spirochaetaceae</i>     | 3.28  | 2.84  | 0.93 | 0.848 |
| <i>Anaeroplasmataceae</i>  | 0.17  | 0.17  | 0.08 | 0.963 |
| <b>Genus</b>               |       |       |      |       |
| <i>Anaerovorax</i>         | 0.05  | 0.14  | 0.05 | 0.975 |
| <i>Acidaminococcus</i>     | 0.00  | 0.03  | 0.02 | 0.975 |
| YRC22                      | 0.55  | 1.42  | 0.69 | 0.357 |
| <i>Prevotella</i>          | 15.06 | 10.43 | 1.72 | 0.357 |
| <i>Parabacteroides</i>     | 3.62  | 3.53  | 1.00 | 0.975 |
| <i>Epulopiscium</i>        | 3.48  | 0.43  | 1.53 | 0.975 |
| <i>Campylobacter</i>       | 1.62  | 0.89  | 0.42 | 0.360 |
| <i>Lachnospira</i>         | 0.09  | 0.01  | 0.03 | 0.975 |
| <i>Dorea</i>               | 40.97 | 43.03 | 5.18 | 0.975 |
| <i>Butyrivibrio</i>        | 1.09  | 0.43  | 0.40 | 0.975 |
| <i>Collinsella</i>         | 0.17  | 0.18  | 0.07 | 0.981 |
| <i>Treponema</i>           | 0.12  | 0.00  | 0.05 | 0.000 |
| <i>Anaerobiospirillum</i>  | 0.65  | 0.50  | 0.31 | 0.975 |
| <i>Succinivibrio</i>       | 0.02  | 0.00  | 0.01 | 0.425 |
| <i>Aggregatibacter</i>     | 0.68  | 0.53  | 0.17 | 0.742 |
| <i>Actinobacillus</i>      | 0.12  | 0.30  | 0.06 | 0.742 |
| <i>Sutterella</i>          | 0.02  | 0.01  | 0.01 | 0.975 |
| <i>Oxalobacter</i>         | 0.01  | 0.03  | 0.01 | 0.975 |
| <i>Mucispirillum</i>       | 1.05  | 1.13  | 0.22 | 0.975 |
| <i>Bacteroides</i>         | 0.02  | 0.03  | 0.01 | 0.975 |
| <i>Prevotella</i>          | 3.78  | 4.96  | 1.34 | 0.979 |
| CF231                      | 0.32  | 0.40  | 0.11 | 0.979 |
| <i>Odoribacter</i>         | 2.57  | 3.94  | 0.82 | 0.975 |
| <i>Paludibacter</i>        | 0.06  | 0.05  | 0.02 | 0.975 |
| <i>Fusobacterium</i>       | 3.11  | 7.39  | 2.11 | 0.975 |

|                                     |       |       |      |       |
|-------------------------------------|-------|-------|------|-------|
| <i>Anaeroplasma</i>                 | 1.42  | 1.99  | 0.63 | 0.975 |
| <i>Turicibacter</i>                 | 2.85  | 2.84  | 0.49 | 0.975 |
| <i>Streptococcus</i>                | 0.04  | 0.03  | 0.02 | 0.975 |
| <i>Lactobacillus</i>                | 0.09  | 0.05  | 0.05 | 0.975 |
| <i>Phascolarctobacterium</i>        | 0.00  | 0.01  | 0.00 | 0.114 |
| <i>Mitsuokella</i>                  | 0.05  | 0.06  | 0.01 | 0.975 |
| <i>Anaerovibrio</i>                 | 0.04  | 0.09  | 0.05 | 0.975 |
| <i>Dialister</i>                    | 1.37  | 1.06  | 0.34 | 0.975 |
| <i>Clostridium</i>                  | 0.00  | 0.13  | 0.06 | 0.975 |
| <i>rc4-4</i>                        | 0.02  | 0.03  | 0.01 | 0.986 |
| <i>Faecalibacterium</i>             | 0.57  | 0.00  | 0.27 | 0.975 |
| <i>Ruminococcus</i>                 | 0.22  | 0.31  | 0.06 | 0.975 |
| <i>Oscillospira</i>                 | 7.44  | 6.37  | 2.63 | 0.510 |
| [ <i>Ruminococcus</i> ]             | 0.41  | 0.46  | 0.15 | 0.979 |
| <i>Coprococcus</i>                  | 0.28  | 0.38  | 0.09 | 0.981 |
| <i>Anaerostipes</i>                 | 0.02  | 0.03  | 0.01 | 0.975 |
| <i>Roseburia</i>                    | 0.00  | 0.06  | 0.03 | 0.975 |
| <i>Blautia</i>                      | 0.09  | 1.49  | 0.64 | 0.975 |
| <i>Desulfovibrio</i>                | 0.05  | 0.09  | 0.05 | 0.975 |
| <i>Fibrobacter</i>                  | 0.78  | 0.53  | 0.43 | 0.975 |
| <i>Helicobacter</i>                 | 4.88  | 3.99  | 1.38 | 0.975 |
| <i>Megasphaera</i>                  | 0.11  | 0.20  | 0.11 | 0.975 |
| <b>Species</b>                      |       |       |      |       |
| <i>Bacteroides plebius</i>          | 0.01  | 0.19  | 0.08 | 0.310 |
| <i>Coprococcus eutactus</i>         | 0.02  | 0.01  | 0.01 | 0.701 |
| <i>Dorea formicigenerans</i>        | 0.09  | 0.26  | 0.10 | 0.701 |
| <i>Collinsella aerofaciens</i>      | 0.12  | 0.08  | 0.03 | 0.701 |
| <i>Fibrobacter succinogenes</i>     | 0.03  | 0.16  | 0.08 | 0.701 |
| <i>Oxalobacter formigenes</i>       | 0.01  | 0.13  | 0.06 | 0.701 |
| <i>Prevotella stercorea</i>         | 21.85 | 20.98 | 3.12 | 0.701 |
| <i>Prevotella copri</i>             | 65.36 | 61.08 | 5.70 | 0.701 |
| <i>Streptococcus luteciae</i>       | 0.14  | 0.05  | 0.08 | 0.701 |
| <i>Lactobacillus mucosae</i>        | 0.06  | 0.06  | 0.05 | 0.701 |
| <i>Faecalibacterium prausnitzii</i> | 10.55 | 16.08 | 4.53 | 0.701 |
| <i>Ruminococcus gnavus</i>          | 0.11  | 0.03  | 0.05 | 0.701 |
| <i>Ruminococcus flavefaciens</i>    | 0.11  | 0.03  | 0.05 | 0.731 |



|                                 |      |      |      |       |
|---------------------------------|------|------|------|-------|
| <i>Mucispirillum schaedleri</i> | 1.02 | 0.14 | 0.28 | 0.830 |
| <i>Mitsuokella multacida</i>    | 0.16 | 0.14 | 0.07 | 0.830 |
| <i>Ruminococcus bromii</i>      | 0.29 | 0.53 | 0.27 | 0.830 |
| <i>Roseburia faecis</i>         | 0.07 | 0.04 | 0.02 | 0.847 |

**Table S5. Differential analysis of bacterial functionality at levels 1-3 and KO terms based on predicted functionality using PICRUSt**

| Function                                                                 | baseMean    | log2Fold Change | lfcSE | p |
|--------------------------------------------------------------------------|-------------|-----------------|-------|---|
| Metabolism; Other                                                        | 28745430.69 | 0.03            | 0.01  | 0 |
| Genetic Information Processing; Other                                    | 13131827.07 | 0.04            | 0.02  | 0 |
| Organismal Systems; Other                                                | 488655.04   | 0.10            | 0.06  | 0 |
| Environmental Information Processing; Other                              | 6681649.74  | -0.10           | 0.10  | 0 |
| Human Diseases; Other                                                    | 532802.23   | -0.07           | 0.07  | 0 |
| None; Other                                                              | 115763.06   | 0.05            | 0.05  | 0 |
| Cellular Processes; Other                                                | 1947519.41  | -0.08           | 0.13  | 0 |
| Unclassified; Other                                                      | 8303698.82  | -0.01           | 0.01  | 0 |
| L2                                                                       |             |                 |       |   |
| Cellular Processes;Cell Growth and Death                                 | 356127.74   | 0.05            | 0.04  | 0 |
| Cellular Processes;Transport and Catabolism                              | 187020.82   | 0.09            | 0.07  | 0 |
| Environmental Information Processing;Signal Transduction                 | 829923.90   | -0.17           | 0.14  | 0 |
| Environmental Information Processing;Signaling Molecules and Interaction | 111185.82   | 0.07            | 0.06  | 0 |
| Genetic Information Processing;Replication and Repair                    | 6045000.30  | 0.04            | 0.03  | 0 |
| Genetic Information Processing;Translation                               | 3901920.81  | 0.04            | 0.02  | 0 |
| Human Diseases;Infectious Diseases                                       | 254850.52   | -0.06           | 0.04  | 0 |
| Metabolism;Biosynthesis of Other Secondary Metabolites                   | 558988.33   | 0.08            | 0.06  | 0 |
| Metabolism;Enzyme Families                                               | 1374962.67  | 0.04            | 0.03  | 0 |
| Metabolism;Nucleotide Metabolism                                         | 2796574.19  | 0.04            | 0.03  | 0 |
| Organismal Systems;Endocrine System                                      | 190408.74   | 0.12            | 0.08  | 0 |
| Organismal Systems;Immune System                                         | 64313.27    | 0.08            | 0.06  | 0 |
| Organismal Systems;Nervous System                                        | 56149.65    | 0.10            | 0.08  | 0 |
| Unclassified;Cellular Processes and Signaling                            | 2409232.51  | -0.04           | 0.03  | 0 |
| Environmental Information Processing;Membrane Transport                  | 5755765.15  | -0.11           | 0.11  | 0 |
| Human Diseases;Metabolic Diseases                                        | 68084.49    | 0.03            | 0.03  | 0 |
| Organismal Systems;Digestive System                                      | 61839.93    | 0.22            | 0.23  | 0 |
| Unclassified;Poorly Characterized                                        | 2891044.99  | -0.02           | 0.02  | 0 |
| Cellular Processes;Cell Motility                                         | 1409065.42  | -0.15           | 0.19  | 0 |
| Human Diseases;Cancers                                                   | 76858.56    | -0.05           | 0.07  | 0 |
| Human Diseases;Cardiovascular Diseases                                   | 10.59       | 1.34            | 2.02  | 0 |
| Human Diseases;Neurodegenerative Diseases                                | 101793.38   | -0.28           | 0.35  | 0 |
| Metabolism;Metabolism of Terpenoids and Polyketides                      | 1073657.00  | 0.03            | 0.03  | 0 |
| Metabolism;Xenobiotics Biodegradation and Metabolism                     | 808595.11   | -0.04           | 0.06  | 0 |
| Organismal Systems;Circulatory System                                    | 11547.01    | -0.57           | 0.77  | 0 |
| Unclassified;Genetic Information Processing                              | 1634557.09  | -0.02           | 0.03  | 0 |
| Genetic Information Processing;Folding, Sorting and Degradation          | 1695035.37  | 0.00            | 0.03  | 0 |

|                                                                          |            |       |      |   |
|--------------------------------------------------------------------------|------------|-------|------|---|
| Genetic Information Processing;Transcription                             | 1485966.72 | 0.01  | 0.05 | 0 |
| Human Diseases;Immune System Diseases                                    | 31721.42   | -0.02 | 0.07 | 0 |
| Metabolism;Amino Acid Metabolism                                         | 5573293.90 | 0.01  | 0.03 | 0 |
| Metabolism;Carbohydrate Metabolism                                       | 5686094.15 | 0.02  | 0.04 | 0 |
| Metabolism;Energy Metabolism                                             | 3749124.62 | 0.01  | 0.02 | 0 |
| Metabolism;Glycan Biosynthesis and Metabolism                            | 1867964.13 | 0.02  | 0.07 | 0 |
| Metabolism;Lipid Metabolism                                              | 1537993.45 | -0.01 | 0.04 | 0 |
| Metabolism;Metabolism of Cofactors and Vitamins                          | 2782637.48 | 0.01  | 0.03 | 0 |
| Metabolism;Metabolism of Other Amino Acids                               | 933880.95  | 0.00  | 0.02 | 0 |
| Organismal Systems;Environmental Adaptation                              | 98663.94   | 0.01  | 0.07 | 0 |
| Organismal Systems;Excretory System                                      | 5273.48    | 0.08  | 0.41 | 0 |
| Unclassified;Metabolism                                                  | 1371127.06 | -0.01 | 0.03 | 0 |
| L3                                                                       |            |       |      |   |
| Cellular Processes;Cell Growth and Death                                 | 356104.30  | 0.05  | 0.04 | 0 |
| Cellular Processes;Transport and Catabolism                              | 187009.94  | 0.09  | 0.07 | 0 |
| Environmental Information Processing;Signal Transduction                 | 829861.09  | -0.17 | 0.14 | 0 |
| Environmental Information Processing;Signaling Molecules and Interaction | 111179.12  | 0.07  | 0.06 | 0 |
| Genetic Information Processing;Replication and Repair                    | 6044610.97 | 0.04  | 0.03 | 0 |
| Genetic Information Processing;Translation                               | 3901667.46 | 0.04  | 0.02 | 0 |
| Human Diseases;Infectious Diseases                                       | 254834.82  | -0.06 | 0.04 | 0 |
| Metabolism;Biosynthesis of Other Secondary Metabolites                   | 558953.02  | 0.08  | 0.06 | 0 |
| Metabolism;Enzyme Families                                               | 1374875.45 | 0.04  | 0.03 | 0 |
| Metabolism;Nucleotide Metabolism                                         | 2796395.62 | 0.04  | 0.03 | 0 |
| Organismal Systems;Endocrine System                                      | 190397.30  | 0.12  | 0.08 | 0 |
| Organismal Systems;Immune System                                         | 64308.94   | 0.08  | 0.06 | 0 |
| Organismal Systems;Nervous System                                        | 56146.36   | 0.10  | 0.08 | 0 |
| Unclassified;Cellular Processes and Signaling                            | 2409075.05 | -0.04 | 0.03 | 0 |
| Human Diseases;Metabolic Diseases                                        | 68080.23   | 0.03  | 0.03 | 0 |
| Environmental Information Processing;Membrane Transport                  | 5755336.53 | -0.11 | 0.11 | 0 |
| Organismal Systems;Digestive System                                      | 61837.00   | 0.22  | 0.23 | 0 |
| Unclassified;Poorly Characterized                                        | 2890857.74 | -0.02 | 0.02 | 0 |
| Human Diseases;Neurodegenerative Diseases                                | 101784.28  | -0.28 | 0.31 | 0 |
| Metabolism;Metabolism of Terpenoids and Polyketides                      | 1073588.02 | 0.03  | 0.03 | 0 |
| Cellular Processes;Cell Motility                                         | 1408947.88 | -0.15 | 0.19 | 0 |
| Human Diseases;Cardiovascular Diseases                                   | 10.59      | 1.34  | 1.87 | 0 |
| Metabolism;Xenobiotics Biodegradation and Metabolism                     | 808539.10  | -0.04 | 0.06 | 0 |
| Organismal Systems;Circulatory System                                    | 11545.64   | -0.57 | 0.78 | 0 |
| Human Diseases;Cancers                                                   | 76853.63   | -0.05 | 0.07 | 0 |
| Unclassified;Genetic Information Processing                              | 1584636.87 | -0.02 | 0.03 | 0 |
| Metabolism;Metabolism of Cofactors and Vitamins                          | 2782460.03 | 0.01  | 0.03 | 0 |
| Genetic Information Processing;Transcription                             | 1485867.12 | 0.01  | 0.05 | 0 |
| Human Diseases;Immune System Diseases                                    | 31719.29   | -0.02 | 0.07 | 0 |
| Metabolism;Amino Acid Metabolism                                         | 5572916.87 | 0.01  | 0.03 | 0 |

|                                                                 |            |       |      |   |
|-----------------------------------------------------------------|------------|-------|------|---|
| Metabolism;Carbohydrate Metabolism                              | 5685716.86 | 0.02  | 0.04 | 0 |
| Metabolism;Energy Metabolism                                    | 3748876.01 | 0.01  | 0.02 | 0 |
| Metabolism;Glycan Biosynthesis and Metabolism                   | 1867853.27 | 0.02  | 0.07 | 0 |
| Metabolism;Lipid Metabolism                                     | 1537891.11 | -0.01 | 0.04 | 0 |
| Metabolism;Metabolism of Other Amino Acids                      | 933820.75  | 0.00  | 0.02 | 0 |
| Organismal Systems;Environmental Adaptation                     | 98656.88   | 0.01  | 0.07 | 0 |
| Organismal Systems;Excretory System                             | 5273.17    | 0.08  | 0.41 | 0 |
| Unclassified;Metabolism                                         | 1420851.41 | -0.01 | 0.04 | 0 |
| Genetic Information Processing;Folding, Sorting and Degradation | 1694926.07 | 0.00  | 0.03 | 0 |
| KO                                                              |            |       |      |   |
| K07445                                                          | 55.42      | 23.95 | 2.96 | 0 |
| K01041                                                          | 242.62     | -3.52 | 0.73 | 0 |
| K02532                                                          | 645.69     | -2.68 | 0.57 | 0 |
| K01085                                                          | 631.06     | -2.68 | 0.60 | 0 |
| K05591                                                          | 426.73     | -3.94 | 1.24 | 0 |
| K05596                                                          | 432.56     | -3.86 | 1.08 | 0 |
| K02457                                                          | 444.17     | -3.46 | 1.00 | 0 |
| K02452                                                          | 528.06     | -3.00 | 0.95 | 0 |
| K02458                                                          | 444.17     | -3.46 | 1.00 | 0 |
| K02459                                                          | 444.17     | -3.46 | 1.00 | 0 |
| K08137                                                          | 426.73     | -3.94 | 1.24 | 0 |
| K13014                                                          | 426.73     | -3.94 | 1.24 | 0 |
| K08567                                                          | 722.41     | -2.43 | 0.62 | 0 |
| K03275                                                          | 426.73     | -3.94 | 1.24 | 0 |
| K09904                                                          | 476.25     | -3.12 | 1.00 | 0 |
| K01826                                                          | 422.10     | -3.89 | 1.24 | 0 |
| K01825                                                          | 1939.61    | -3.28 | 0.98 | 0 |
| K02849                                                          | 525.59     | -3.22 | 0.83 | 0 |
| K14061                                                          | 1512.54    | -3.13 | 0.97 | 0 |
| K14062                                                          | 426.73     | -3.94 | 1.24 | 0 |
| K02844                                                          | 522.82     | -3.16 | 1.00 | 0 |
| K02847                                                          | 426.73     | -3.94 | 1.24 | 0 |
| K07349                                                          | 853.91     | -3.93 | 1.15 | 0 |
| K07348                                                          | 426.73     | -3.94 | 1.24 | 0 |
| K07345                                                          | 2788.60    | -3.45 | 0.99 | 0 |
| K07347                                                          | 3027.62    | -3.12 | 0.96 | 0 |
| K07346                                                          | 1513.79    | -3.12 | 0.97 | 0 |
| K07340                                                          | 476.25     | -3.12 | 1.00 | 0 |
| K08993                                                          | 494.39     | -3.52 | 0.95 | 0 |
| K08344                                                          | 420.80     | -3.95 | 1.24 | 0 |
| K05921                                                          | 1118.46    | -2.82 | 0.89 | 0 |
| K05820                                                          | 476.25     | -3.12 | 1.00 | 0 |
| K02478                                                          | 458.03     | -3.47 | 0.94 | 0 |
| K11748                                                          | 440.26     | -3.56 | 1.04 | 0 |
| K11742                                                          | 1143.53    | -2.11 | 0.67 | 0 |

|        |         |       |      |   |
|--------|---------|-------|------|---|
| K09923 | 476.25  | -3.12 | 1.00 | 0 |
| K01669 | 582.24  | -2.74 | 0.82 | 0 |
| K12152 | 446.40  | -3.56 | 1.04 | 0 |
| K00322 | 426.73  | -3.94 | 1.24 | 0 |
| K10804 | 857.23  | -3.76 | 1.12 | 0 |
| K10805 | 446.40  | -3.56 | 1.04 | 0 |
| K05804 | 1645.06 | -2.54 | 0.79 | 0 |
| K05805 | 452.97  | -3.56 | 0.96 | 0 |
| K05800 | 430.82  | -3.88 | 1.19 | 0 |
| K00121 | 1092.89 | -2.54 | 0.67 | 0 |
| K13051 | 433.81  | -3.82 | 1.08 | 0 |
| K12058 | 444.79  | -3.46 | 0.99 | 0 |
| K06140 | 426.73  | -3.94 | 1.24 | 0 |
| K02082 | 524.05  | -2.62 | 0.72 | 0 |
| K03933 | 426.73  | -3.94 | 1.24 | 0 |
| K02336 | 428.09  | -3.89 | 1.24 | 0 |
| K07306 | 1165.64 | -2.46 | 0.78 | 0 |
| K02610 | 420.80  | -3.95 | 1.24 | 0 |
| K02612 | 420.80  | -3.95 | 1.24 | 0 |
| K09476 | 420.80  | -3.95 | 1.24 | 0 |
| K09471 | 476.25  | -3.12 | 1.00 | 0 |
| K06219 | 426.73  | -3.94 | 1.24 | 0 |
| K08485 | 426.73  | -3.94 | 1.24 | 0 |
| K08484 | 450.30  | -3.46 | 1.00 | 0 |
| K03919 | 422.10  | -3.89 | 1.24 | 0 |
| K08163 | 420.80  | -3.95 | 1.24 | 0 |
| K08359 | 433.04  | -3.58 | 1.06 | 0 |
| K08354 | 420.80  | -3.95 | 1.24 | 0 |
| K08350 | 469.92  | -3.13 | 0.95 | 0 |
| K00855 | 426.73  | -3.94 | 1.24 | 0 |
| K03767 | 585.72  | -2.60 | 0.73 | 0 |
| K03762 | 480.37  | -2.88 | 0.86 | 0 |
| K12582 | 456.80  | -3.36 | 1.00 | 0 |
| K03970 | 432.56  | -3.86 | 1.08 | 0 |
| K03974 | 432.56  | -3.86 | 1.08 | 0 |
| K05517 | 431.15  | -3.97 | 1.23 | 0 |
| K07700 | 426.73  | -3.94 | 1.24 | 0 |
| K07702 | 426.73  | -3.94 | 1.24 | 0 |
| K07708 | 452.97  | -3.56 | 0.96 | 0 |
| K06212 | 530.47  | -2.42 | 0.74 | 0 |
| K02618 | 420.80  | -3.95 | 1.24 | 0 |
| K02616 | 420.80  | -3.95 | 1.24 | 0 |
| K02611 | 420.80  | -3.95 | 1.24 | 0 |
| K02613 | 420.80  | -3.95 | 1.24 | 0 |
| K06866 | 476.25  | -3.12 | 1.00 | 0 |
| K14089 | 351.07  | 1.94  | 0.52 | 0 |

|        |         |       |      |   |
|--------|---------|-------|------|---|
| K01554 | 420.80  | -3.95 | 1.24 | 0 |
| K02399 | 428.09  | -3.89 | 1.24 | 0 |
| K02391 | 428.09  | -3.89 | 1.24 | 0 |
| K12339 | 452.97  | -3.56 | 0.96 | 0 |
| K14060 | 420.80  | -3.95 | 1.24 | 0 |
| K00632 | 1554.58 | -1.97 | 0.57 | 0 |
| K07810 | 445.52  | -3.60 | 0.96 | 0 |
| K00892 | 426.73  | -3.94 | 1.24 | 0 |
| K08151 | 465.66  | -3.23 | 0.81 | 0 |
| K08154 | 426.73  | -3.94 | 1.24 | 0 |
| K01761 | 562.10  | -2.69 | 0.76 | 0 |
| K01766 | 476.25  | -3.12 | 1.00 | 0 |
| K08167 | 426.73  | -3.94 | 1.24 | 0 |
| K14414 | 420.80  | -3.95 | 1.24 | 0 |
| K03721 | 486.09  | -3.03 | 0.91 | 0 |
| K00151 | 420.80  | -3.95 | 1.24 | 0 |
| K04091 | 423.00  | -3.90 | 1.15 | 0 |
| K02001 | 625.94  | -2.64 | 0.71 | 0 |
| K02000 | 688.62  | -2.59 | 0.79 | 0 |
| K02002 | 707.77  | -2.49 | 0.73 | 0 |
| K07746 | 433.04  | -3.58 | 1.06 | 0 |
| K10778 | 434.75  | -3.74 | 1.08 | 0 |
| K01906 | 66.52   | 4.46  | 1.31 | 0 |
| K09921 | 447.70  | -3.53 | 1.04 | 0 |
| K10906 | 420.80  | -3.95 | 1.24 | 0 |
| K04058 | 420.80  | -3.95 | 1.24 | 0 |
| K01460 | 446.40  | -3.56 | 1.04 | 0 |
| K11192 | 426.73  | -3.94 | 1.24 | 0 |
| K10716 | 426.73  | -3.94 | 1.24 | 0 |
| K07783 | 677.06  | -2.44 | 0.75 | 0 |
| K01252 | 420.80  | -3.95 | 1.24 | 0 |
| K01070 | 435.41  | -3.87 | 1.16 | 0 |
| K01782 | 1844.57 | -2.48 | 0.71 | 0 |
| K03782 | 477.50  | -2.95 | 0.88 | 0 |
| K03788 | 456.80  | -3.36 | 1.00 | 0 |
| K09788 | 655.11  | -2.22 | 0.66 | 0 |
| K06144 | 426.73  | -3.94 | 1.24 | 0 |
| K02565 | 438.53  | -3.98 | 1.24 | 0 |
| K02508 | 420.80  | -3.95 | 1.24 | 0 |
| K06080 | 426.73  | -3.94 | 1.24 | 0 |
| K06887 | 1512.54 | -3.13 | 0.97 | 0 |
| K00483 | 583.08  | -2.29 | 0.69 | 0 |
| K00484 | 440.38  | -3.54 | 1.06 | 0 |
| K09901 | 476.25  | -3.12 | 1.00 | 0 |
| K07684 | 476.33  | -3.35 | 0.89 | 0 |
| K07686 | 652.09  | -2.48 | 0.78 | 0 |

|        |         |       |      |   |
|--------|---------|-------|------|---|
| K07689 | 426.73  | -3.94 | 1.24 | 0 |
| K04016 | 476.25  | -3.12 | 1.00 | 0 |
| K12972 | 855.71  | -3.84 | 1.13 | 0 |
| K12973 | 428.09  | -3.89 | 1.24 | 0 |
| K12974 | 426.73  | -3.94 | 1.24 | 0 |
| K12288 | 426.73  | -3.94 | 1.24 | 0 |
| K12289 | 426.73  | -3.94 | 1.24 | 0 |
| K00073 | 460.59  | -3.19 | 0.96 | 0 |
| K08276 | 433.44  | -3.78 | 1.08 | 0 |
| K02746 | 683.99  | -2.08 | 0.58 | 0 |
| K02747 | 498.44  | -3.10 | 0.78 | 0 |
| K02745 | 527.95  | -3.00 | 0.73 | 0 |
| K07666 | 476.25  | -3.12 | 1.00 | 0 |
| K07664 | 426.73  | -3.94 | 1.24 | 0 |
| K07660 | 426.73  | -3.94 | 1.24 | 0 |
| K07002 | 1444.82 | -1.76 | 0.55 | 0 |
| K09181 | 706.22  | -2.62 | 0.70 | 0 |
| K01150 | 458.41  | -3.41 | 0.95 | 0 |
| K05522 | 420.80  | -3.95 | 1.24 | 0 |
| K11933 | 434.11  | -3.92 | 1.16 | 0 |
| K11932 | 426.73  | -3.94 | 1.24 | 0 |
| K11939 | 426.73  | -3.94 | 1.24 | 0 |
| K07274 | 460.36  | -4.00 | 1.23 | 0 |
| K02485 | 450.30  | -3.46 | 1.00 | 0 |
| K02487 | 420.80  | -3.95 | 1.24 | 0 |
| K09954 | 426.73  | -3.94 | 1.24 | 0 |
| K07490 | 426.73  | -3.94 | 1.24 | 0 |
| K11203 | 637.56  | -2.11 | 0.59 | 0 |
| K11201 | 420.80  | -3.95 | 1.24 | 0 |
| K14187 | 1244.95 | -2.39 | 0.74 | 0 |
| K02769 | 909.08  | -1.48 | 0.45 | 0 |
| K09895 | 476.25  | -3.12 | 1.00 | 0 |
| K09894 | 476.25  | -3.12 | 1.00 | 0 |
| K03828 | 443.67  | -3.69 | 1.05 | 0 |
| K03824 | 432.56  | -3.86 | 1.08 | 0 |
| K11911 | 426.73  | -3.94 | 1.24 | 0 |
| K12062 | 420.80  | -3.95 | 1.24 | 0 |
| K12066 | 420.80  | -3.95 | 1.24 | 0 |
| K07251 | 456.80  | -3.36 | 1.00 | 0 |
| K09975 | 426.73  | -3.94 | 1.24 | 0 |
| K09978 | 426.73  | -3.94 | 1.24 | 0 |
| K11263 | 420.80  | -3.95 | 1.24 | 0 |
| K13053 | 426.73  | -3.94 | 1.24 | 0 |
| K08369 | 711.23  | -1.93 | 0.56 | 0 |
| K06937 | 183.92  | 1.45  | 0.44 | 0 |
| K05916 | 451.77  | -3.60 | 0.96 | 0 |

|        |         |       |      |   |
|--------|---------|-------|------|---|
| K05875 | 426.73  | -3.94 | 1.24 | 0 |
| K05874 | 428.09  | -3.89 | 1.24 | 0 |
| K05877 | 426.73  | -3.94 | 1.24 | 0 |
| K03840 | 426.73  | -3.94 | 1.24 | 0 |
| K09910 | 476.25  | -3.12 | 1.00 | 0 |
| K09916 | 426.73  | -3.94 | 1.24 | 0 |
| K09917 | 476.25  | -3.12 | 1.00 | 0 |
| K11535 | 426.73  | -3.94 | 1.24 | 0 |
| K11537 | 523.45  | -3.87 | 0.98 | 0 |
| K01584 | 428.09  | -3.89 | 1.24 | 0 |
| K08348 | 452.45  | -3.33 | 0.99 | 0 |
| K01638 | 436.54  | -3.80 | 1.07 | 0 |
| K01637 | 428.09  | -3.89 | 1.24 | 0 |
| K02615 | 420.80  | -3.95 | 1.24 | 0 |
| K02852 | 538.69  | -2.72 | 0.85 | 0 |
| K02853 | 456.80  | -3.36 | 1.00 | 0 |
| K03675 | 440.31  | -3.57 | 1.04 | 0 |
| K06006 | 426.73  | -3.94 | 1.24 | 0 |
| K07357 | 847.87  | -3.94 | 1.15 | 0 |
| K07350 | 426.73  | -3.94 | 1.24 | 0 |
| K07351 | 426.73  | -3.94 | 1.24 | 0 |
| K06918 | 476.25  | -3.12 | 1.00 | 0 |
| K06916 | 536.14  | -2.99 | 0.93 | 0 |
| K09161 | 446.40  | -3.56 | 1.04 | 0 |
| K09160 | 476.25  | -3.12 | 1.00 | 0 |
| K01354 | 426.73  | -3.94 | 1.24 | 0 |
| K01355 | 420.80  | -3.95 | 1.24 | 0 |
| K03623 | 455.27  | -3.41 | 0.91 | 0 |
| K03212 | 476.25  | -3.12 | 1.00 | 0 |
| K07136 | 426.73  | -3.94 | 1.24 | 0 |
| K13301 | 426.73  | -3.94 | 1.24 | 0 |
| K07165 | 422.10  | -3.89 | 1.24 | 0 |
| K07160 | 1724.78 | -1.12 | 0.35 | 0 |
| K03472 | 426.73  | -3.94 | 1.24 | 0 |
| K06970 | 431.15  | -3.97 | 1.23 | 0 |
| K05836 | 426.73  | -3.94 | 1.24 | 0 |
| K05839 | 426.73  | -3.94 | 1.24 | 0 |
| K07677 | 426.73  | -3.94 | 1.24 | 0 |
| K02464 | 426.08  | -3.87 | 1.13 | 0 |
| K02462 | 420.80  | -3.95 | 1.24 | 0 |
| K02461 | 420.80  | -3.95 | 1.24 | 0 |
| K02460 | 528.06  | -3.00 | 0.95 | 0 |
| K03225 | 433.81  | -3.82 | 1.08 | 0 |
| K08682 | 426.73  | -3.94 | 1.24 | 0 |
| K11750 | 426.73  | -3.94 | 1.24 | 0 |
| K13938 | 420.80  | -3.95 | 1.24 | 0 |



|        |         |       |      |   |
|--------|---------|-------|------|---|
| K07146 | 498.05  | -3.30 | 0.81 | 0 |
| K07140 | 458.15  | -3.33 | 1.00 | 0 |
| K08308 | 426.73  | -3.94 | 1.24 | 0 |
| K12149 | 456.80  | -3.36 | 1.00 | 0 |
| K12148 | 426.73  | -3.94 | 1.24 | 0 |
| K07312 | 426.73  | -3.94 | 1.24 | 0 |
| K06956 | 1513.35 | -1.77 | 0.50 | 0 |
| K05812 | 426.73  | -3.94 | 1.24 | 0 |
| K05811 | 426.73  | -3.94 | 1.24 | 0 |
| K05816 | 438.80  | -3.49 | 0.97 | 0 |
| K01146 | 426.73  | -3.94 | 1.24 | 0 |
| K02403 | 428.09  | -3.89 | 1.24 | 0 |
| K02402 | 428.09  | -3.89 | 1.24 | 0 |
| K13041 | 457.86  | -3.31 | 0.90 | 0 |
| K13040 | 433.04  | -3.58 | 1.06 | 0 |
| K07120 | 474.23  | -3.57 | 0.94 | 0 |
| K01690 | 428.09  | -3.89 | 1.24 | 0 |
| K03435 | 446.40  | -3.56 | 1.04 | 0 |
| K02345 | 426.73  | -3.94 | 1.24 | 0 |
| K05997 | 426.73  | -3.94 | 1.24 | 0 |
| K03812 | 426.73  | -3.94 | 1.24 | 0 |
| K01194 | 420.80  | -3.95 | 1.24 | 0 |
| K05343 | 1113.20 | 1.85  | 0.58 | 0 |
| K02425 | 426.73  | -3.94 | 1.24 | 0 |
| K03776 | 428.09  | -3.89 | 1.24 | 0 |
| K03777 | 456.80  | -3.36 | 1.00 | 0 |
| K08478 | 420.80  | -3.95 | 1.24 | 0 |
| K08476 | 420.80  | -3.95 | 1.24 | 0 |
| K08475 | 420.80  | -3.95 | 1.24 | 0 |
| K00455 | 420.80  | -3.95 | 1.24 | 0 |
| K04752 | 430.82  | -3.88 | 1.19 | 0 |
| K02363 | 426.73  | -3.94 | 1.24 | 0 |
| K11103 | 463.43  | -3.39 | 0.91 | 0 |
| K06445 | 428.09  | -3.89 | 1.24 | 0 |
| K07642 | 462.56  | -3.01 | 0.92 | 0 |
| K07394 | 426.73  | -3.94 | 1.24 | 0 |
| K04103 | 432.56  | -3.86 | 1.08 | 0 |
| K07715 | 539.55  | -2.98 | 0.93 | 0 |
| K07711 | 426.73  | -3.94 | 1.24 | 0 |
| K13771 | 565.40  | -2.81 | 0.87 | 0 |
| K02198 | 922.64  | -1.71 | 0.50 | 0 |
| K02193 | 782.38  | -1.89 | 0.52 | 0 |
| K02197 | 896.95  | -1.73 | 0.51 | 0 |
| K02194 | 896.95  | -1.73 | 0.51 | 0 |
| K03717 | 451.60  | -3.43 | 1.00 | 0 |
| K11733 | 426.73  | -3.94 | 1.24 | 0 |

|        |         |       |      |   |
|--------|---------|-------|------|---|
| K07806 | 426.73  | -3.94 | 1.24 | 0 |
| K02609 | 420.80  | -3.95 | 1.24 | 0 |
| K00146 | 420.80  | -3.95 | 1.24 | 0 |
| K14090 | 397.67  | 1.82  | 0.46 | 0 |
| K02848 | 426.73  | -3.94 | 1.24 | 0 |
| K06222 | 420.80  | -3.95 | 1.24 | 0 |
| K07285 | 469.71  | -3.20 | 0.89 | 0 |
| K00883 | 497.49  | -2.80 | 0.81 | 0 |
| K08172 | 420.80  | -3.95 | 1.24 | 0 |
| K12684 | 452.45  | -3.33 | 0.99 | 0 |
| K12685 | 476.33  | -3.35 | 0.89 | 0 |
| K04080 | 426.73  | -3.94 | 1.24 | 0 |
| K10748 | 426.73  | -3.94 | 1.24 | 0 |
| K07771 | 426.73  | -3.94 | 1.24 | 0 |
| K12518 | 847.87  | -3.94 | 1.15 | 0 |
| K12519 | 847.87  | -3.94 | 1.15 | 0 |
| K12517 | 847.87  | -3.94 | 1.15 | 0 |
| K07186 | 476.25  | -3.12 | 1.00 | 0 |
| K04062 | 441.61  | -3.53 | 1.04 | 0 |
| K10004 | 452.97  | -3.56 | 0.96 | 0 |
| K10002 | 452.97  | -3.56 | 0.96 | 0 |
| K10003 | 452.97  | -3.56 | 0.96 | 0 |
| K10001 | 455.62  | -3.49 | 0.96 | 0 |
| K14588 | 426.73  | -3.94 | 1.24 | 0 |
| K02423 | 426.73  | -3.94 | 1.24 | 0 |
| K11183 | 445.97  | -3.51 | 0.97 | 0 |
| K07796 | 436.87  | -3.90 | 1.08 | 0 |
| K07795 | 1186.43 | -2.05 | 0.60 | 0 |
| K00228 | 452.11  | -3.45 | 1.00 | 0 |
| K01061 | 453.53  | -3.22 | 1.00 | 0 |
| K12530 | 426.73  | -3.94 | 1.24 | 0 |
| K12531 | 420.80  | -3.95 | 1.24 | 0 |
| K12532 | 420.80  | -3.95 | 1.24 | 0 |
| K04046 | 428.09  | -3.89 | 1.24 | 0 |
| K05790 | 446.40  | -3.56 | 1.04 | 0 |
| K05791 | 426.73  | -3.94 | 1.24 | 0 |
| K05792 | 461.62  | -3.19 | 0.86 | 0 |
| K05793 | 426.73  | -3.94 | 1.24 | 0 |
| K05798 | 426.73  | -3.94 | 1.24 | 0 |
| K01479 | 424.96  | -3.82 | 1.13 | 0 |
| K02079 | 420.80  | -3.95 | 1.24 | 0 |
| K06175 | 499.47  | -2.87 | 0.87 | 0 |
| K06858 | 426.73  | -3.94 | 1.24 | 0 |
| K07229 | 426.73  | -3.94 | 1.24 | 0 |
| K07225 | 426.73  | -3.94 | 1.24 | 0 |
| K07454 | 420.80  | -3.95 | 1.24 | 0 |

|        |         |       |      |   |
|--------|---------|-------|------|---|
| K08227 | 426.73  | -3.94 | 1.24 | 0 |
| K02790 | 420.80  | -3.95 | 1.24 | 0 |
| K03112 | 426.73  | -3.94 | 1.24 | 0 |
| K07054 | 674.67  | -2.36 | 0.73 | 0 |
| K13638 | 426.73  | -3.94 | 1.24 | 0 |
| K13639 | 426.73  | -3.94 | 1.24 | 0 |
| K00108 | 434.85  | -3.82 | 1.18 | 0 |
| K06156 | 426.73  | -3.94 | 1.24 | 0 |
| K11940 | 426.73  | -3.94 | 1.24 | 0 |
| K02511 | 420.80  | -3.95 | 1.24 | 0 |
| K07070 | 426.73  | -3.94 | 1.24 | 0 |
| K12963 | 426.73  | -3.94 | 1.24 | 0 |
| K12961 | 426.73  | -3.94 | 1.24 | 0 |
| K14744 | 1512.54 | -3.13 | 0.97 | 0 |
| K02167 | 426.73  | -3.94 | 1.24 | 0 |
| K11923 | 434.11  | -3.92 | 1.16 | 0 |
| K11926 | 426.73  | -3.94 | 1.24 | 0 |
| K11925 | 426.73  | -3.94 | 1.24 | 0 |
| K07269 | 426.73  | -3.94 | 1.24 | 0 |
| K07480 | 2787.25 | -3.45 | 0.99 | 0 |
| K07489 | 847.87  | -3.94 | 1.15 | 0 |
| K00932 | 420.80  | -3.95 | 1.24 | 0 |
| K03485 | 428.12  | -3.92 | 1.16 | 0 |
| K07675 | 894.03  | -2.03 | 0.56 | 0 |
| K07676 | 426.73  | -3.94 | 1.24 | 0 |
| K07673 | 451.77  | -3.60 | 0.96 | 0 |
| K05880 | 420.80  | -3.95 | 1.24 | 0 |
| K05881 | 440.31  | -3.57 | 1.04 | 0 |
| K06195 | 428.09  | -3.89 | 1.24 | 0 |
| K11909 | 426.73  | -3.94 | 1.24 | 0 |
| K11906 | 428.99  | -3.90 | 1.15 | 0 |
| K11903 | 966.17  | -3.04 | 0.93 | 0 |
| K07246 | 1693.31 | -1.05 | 0.33 | 0 |
| K01601 | 58.52   | 6.94  | 1.93 | 0 |
| K03603 | 476.25  | -3.12 | 1.00 | 0 |
| K06078 | 426.73  | -3.94 | 1.24 | 0 |
| K06079 | 480.17  | -3.24 | 0.93 | 0 |
| K06073 | 426.73  | -3.94 | 1.24 | 0 |
| K06074 | 426.73  | -3.94 | 1.24 | 0 |
| K07659 | 560.95  | -2.85 | 0.83 | 0 |
| K09912 | 420.80  | -3.95 | 1.24 | 0 |
| K09914 | 432.56  | -3.86 | 1.08 | 0 |
| K11250 | 451.77  | -3.60 | 0.96 | 0 |
| K11258 | 476.25  | -3.12 | 1.00 | 0 |
| K10124 | 420.80  | -3.95 | 1.24 | 0 |
| K03668 | 451.77  | -3.60 | 0.96 | 0 |

|        |         |       |      |   |
|--------|---------|-------|------|---|
| K09771 | 448.11  | -3.43 | 0.92 | 0 |
| K07637 | 426.73  | -3.94 | 1.24 | 0 |
| K07638 | 476.98  | -3.22 | 0.88 | 0 |
| K05903 | 275.29  | 2.81  | 0.72 | 0 |
| K01500 | 470.52  | 1.41  | 0.45 | 0 |
| K11904 | 1583.27 | -2.76 | 0.88 | 0 |
| K03774 | 579.84  | -2.43 | 0.78 | 0 |
| K08319 | 470.09  | -3.12 | 1.00 | 0 |
| K09890 | 470.09  | -3.12 | 1.00 | 0 |
| K09900 | 469.08  | -3.12 | 1.00 | 0 |
| K00884 | 477.60  | -3.10 | 0.99 | 0 |
| K01468 | 823.61  | -1.67 | 0.54 | 0 |
| K05501 | 721.30  | -2.22 | 0.71 | 0 |
| K04097 | 423.39  | -3.85 | 1.24 | 0 |
| K07774 | 423.39  | -3.85 | 1.24 | 0 |
| K06039 | 660.12  | -2.44 | 0.79 | 0 |
| K00219 | 643.29  | -1.98 | 0.64 | 0 |
| K07685 | 660.12  | -2.44 | 0.79 | 0 |
| K07644 | 429.38  | -3.85 | 1.24 | 0 |
| K10680 | 429.38  | -3.85 | 1.24 | 0 |
| K04067 | 660.12  | -2.44 | 0.79 | 0 |
| K00371 | 759.62  | -1.69 | 0.55 | 0 |
| K00370 | 759.62  | -1.69 | 0.55 | 0 |
| K00373 | 759.62  | -1.69 | 0.55 | 0 |
| K02552 | 715.98  | -2.13 | 0.69 | 0 |
| K04014 | 617.45  | -2.26 | 0.73 | 0 |
| K12940 | 605.07  | -2.09 | 0.68 | 0 |
| K13695 | 1284.67 | -2.03 | 0.66 | 0 |
| K12369 | 720.66  | -2.09 | 0.68 | 0 |
| K08680 | 725.60  | -2.29 | 0.75 | 0 |
| K07733 | 1127.60 | -2.69 | 0.88 | 0 |
| K01066 | 709.40  | -2.00 | 0.65 | 0 |
| K08994 | 427.53  | -3.70 | 1.20 | 0 |
| K07156 | 433.50  | -3.69 | 1.20 | 0 |
| K06946 | 433.50  | -3.69 | 1.20 | 0 |
| K07245 | 433.50  | -3.69 | 1.20 | 0 |
| K02572 | 763.68  | -2.24 | 0.73 | 0 |
| K03566 | 482.69  | -3.00 | 0.98 | 0 |
| K09795 | 1024.73 | -2.40 | 0.79 | 0 |
| K01664 | 1419.55 | -1.79 | 0.59 | 0 |
| K01720 | 1020.28 | -2.41 | 0.79 | 0 |
| K07649 | 425.94  | -3.76 | 1.24 | 0 |
| K03417 | 1021.47 | -2.40 | 0.79 | 0 |
| K12056 | 1015.65 | -2.40 | 0.79 | 0 |
| K01011 | 2893.21 | -1.45 | 0.48 | 0 |
| K10011 | 1091.64 | -2.90 | 0.96 | 0 |

|        |         |       |      |   |
|--------|---------|-------|------|---|
| K11996 | 669.38  | -2.17 | 0.72 | 0 |
| K07000 | 778.55  | -2.26 | 0.75 | 0 |
| K12068 | 1013.09 | -2.40 | 0.79 | 0 |
| K12063 | 1013.09 | -2.40 | 0.79 | 0 |
| K12060 | 1013.09 | -2.40 | 0.79 | 0 |
| K12061 | 1013.09 | -2.40 | 0.79 | 0 |
| K12065 | 1013.09 | -2.40 | 0.79 | 0 |
| K05368 | 1091.64 | -2.90 | 0.96 | 0 |
| K12525 | 1085.47 | -2.89 | 0.96 | 0 |
| K01160 | 1085.47 | -2.89 | 0.96 | 0 |
| K07264 | 1169.43 | -2.76 | 0.91 | 0 |
| K03837 | 1581.44 | -1.62 | 0.53 | 0 |
| K07275 | 667.34  | -2.35 | 0.78 | 0 |
| K07334 | 1379.04 | -1.34 | 0.45 | 0 |
| K01407 | 670.28  | -2.37 | 0.79 | 0 |
| K07712 | 672.80  | -2.60 | 0.87 | 0 |
| K14260 | 3829.70 | -0.89 | 0.30 | 0 |
| K02430 | 664.27  | -2.37 | 0.79 | 0 |
| K00313 | 560.19  | -2.15 | 0.72 | 0 |
| K04013 | 590.99  | -2.46 | 0.83 | 0 |
| K12057 | 1037.10 | -2.33 | 0.78 | 0 |
| K12067 | 1037.10 | -2.33 | 0.78 | 0 |
| K08996 | 546.42  | -2.14 | 0.72 | 0 |
| K00758 | 450.40  | -3.20 | 1.08 | 0 |
| K02445 | 1461.50 | -1.00 | 0.34 | 0 |
| K08325 | 521.90  | -2.96 | 1.00 | 0 |
| K07482 | 953.28  | 1.95  | 0.66 | 0 |
| K10679 | 745.71  | -2.24 | 0.76 | 0 |
| K06211 | 663.50  | -1.79 | 0.61 | 0 |
| K07286 | 696.38  | -2.26 | 0.77 | 0 |
| K13926 | 745.30  | -2.30 | 0.78 | 0 |
| K14392 | 1351.40 | -1.35 | 0.46 | 0 |
| K05982 | 510.73  | -3.27 | 1.12 | 0 |
| K01792 | 489.89  | -2.90 | 0.99 | 0 |
| K03297 | 1723.44 | -1.56 | 0.53 | 0 |
| K11896 | 1141.35 | -2.53 | 0.87 | 0 |
| K03746 | 765.02  | -2.11 | 0.73 | 0 |
| K13256 | 609.34  | -1.92 | 0.66 | 0 |
| K05785 | 592.62  | -2.71 | 0.94 | 0 |
| K02688 | 651.49  | -1.84 | 0.64 | 0 |
| K07308 | 533.29  | -2.25 | 0.78 | 0 |
| K02553 | 701.44  | -2.31 | 0.80 | 0 |
| K07034 | 798.21  | -2.21 | 0.77 | 0 |
| K09907 | 689.79  | -2.29 | 0.80 | 0 |
| K08990 | 689.79  | -2.29 | 0.80 | 0 |
| K12372 | 689.79  | -2.29 | 0.80 | 0 |

|        |         |       |      |   |
|--------|---------|-------|------|---|
| K12370 | 689.79  | -2.29 | 0.80 | 0 |
| K12371 | 689.79  | -2.29 | 0.80 | 0 |
| K09896 | 689.79  | -2.29 | 0.80 | 0 |
| K09898 | 689.79  | -2.29 | 0.80 | 0 |
| K07640 | 689.79  | -2.29 | 0.80 | 0 |
| K05952 | 689.79  | -2.29 | 0.80 | 0 |
| K03214 | 689.79  | -2.29 | 0.80 | 0 |
| K11900 | 544.17  | -2.57 | 0.90 | 0 |
| K11901 | 544.17  | -2.57 | 0.90 | 0 |
| K06906 | 544.10  | -2.56 | 0.89 | 0 |
| K02472 | 678.95  | -2.28 | 0.80 | 0 |
| K02569 | 774.26  | -1.85 | 0.65 | 0 |
| K07784 | 683.74  | -2.28 | 0.80 | 0 |
| K08159 | 830.38  | -1.98 | 0.69 | 0 |
| K08138 | 237.82  | -2.24 | 0.79 | 0 |
| K07109 | 685.70  | -2.25 | 0.79 | 0 |
| K06282 | 991.30  | -1.59 | 0.56 | 0 |
| K06281 | 991.30  | -1.59 | 0.56 | 0 |
| K01141 | 750.35  | -2.19 | 0.77 | 0 |
| K02339 | 742.78  | -2.16 | 0.77 | 0 |
| K07694 | 375.48  | 1.34  | 0.48 | 0 |
| K03926 | 579.31  | -2.36 | 0.84 | 0 |
| K11907 | 543.27  | -2.57 | 0.91 | 0 |
| K00344 | 725.93  | -2.14 | 0.76 | 0 |
| K03560 | 740.04  | -2.16 | 0.77 | 0 |
| K04772 | 740.04  | -2.16 | 0.77 | 0 |
| K10914 | 1371.57 | -1.39 | 0.50 | 0 |
| K09862 | 740.04  | -2.16 | 0.77 | 0 |
| K01247 | 728.44  | -1.61 | 0.58 | 0 |
| K07014 | 741.83  | -2.14 | 0.77 | 0 |
| K06203 | 768.93  | -2.10 | 0.76 | 0 |
| K13889 | 665.70  | -1.72 | 0.62 | 0 |
| K02200 | 861.59  | -1.88 | 0.67 | 0 |
| K03567 | 588.60  | -2.37 | 0.86 | 0 |
| K03684 | 1050.42 | -1.58 | 0.57 | 0 |
| K02742 | 773.78  | -2.19 | 0.80 | 0 |
| K02052 | 2176.93 | -1.08 | 0.39 | 0 |
| K11751 | 1614.50 | -2.05 | 0.74 | 0 |
| K06904 | 963.39  | -1.33 | 0.48 | 0 |
| K09858 | 1005.71 | -1.73 | 0.63 | 0 |
| K02301 | 695.54  | -2.31 | 0.85 | 0 |
| K07019 | 541.08  | -2.40 | 0.88 | 0 |
| K02784 | 962.36  | -1.92 | 0.70 | 0 |
| K03756 | 238.65  | 2.23  | 0.82 | 0 |
| K03583 | 1066.45 | -1.78 | 0.66 | 0 |
| K14393 | 1688.44 | -1.80 | 0.67 | 0 |

|        |         |       |      |   |
|--------|---------|-------|------|---|
| K06077 | 904.64  | -1.99 | 0.74 | 0 |
| K06879 | 956.77  | -1.86 | 0.69 | 0 |
| K06968 | 696.03  | -2.28 | 0.85 | 0 |
| K01139 | 2169.13 | -1.22 | 0.45 | 0 |
| K00060 | 755.94  | -1.54 | 0.57 | 0 |
| K00568 | 1721.10 | -1.90 | 0.71 | 0 |
| K02195 | 693.76  | -1.87 | 0.70 | 0 |
| K09925 | 215.76  | -1.41 | 0.53 | 0 |
| K03808 | 1924.54 | -1.88 | 0.71 | 0 |
| K07396 | 499.50  | -2.42 | 0.91 | 0 |
| K07250 | 1508.46 | -1.04 | 0.39 | 0 |
| K14055 | 684.30  | -2.36 | 0.89 | 0 |
| K03314 | 684.30  | -2.36 | 0.89 | 0 |
| K11107 | 684.30  | -2.36 | 0.89 | 0 |
| K02439 | 1002.96 | -1.33 | 0.50 | 0 |
| K03185 | 732.01  | -2.12 | 0.80 | 0 |
| K04085 | 1006.80 | -1.77 | 0.67 | 0 |
| K02116 | 1723.60 | -1.04 | 0.39 | 0 |
| K02168 | 1640.75 | -2.10 | 0.80 | 0 |
| K06886 | 714.05  | -1.67 | 0.63 | 0 |
| K03222 | 671.52  | -2.42 | 0.92 | 0 |
| K06911 | 5484.24 | -0.97 | 0.37 | 0 |
| K12297 | 962.89  | -1.79 | 0.68 | 0 |
| K07223 | 1695.47 | -1.84 | 0.70 | 0 |
| K03478 | 580.53  | -1.92 | 0.73 | 0 |
| K08224 | 1358.71 | -1.72 | 0.66 | 0 |
| K09908 | 714.14  | -2.22 | 0.86 | 0 |
| K09906 | 714.14  | -2.22 | 0.86 | 0 |
| K08992 | 714.14  | -2.22 | 0.86 | 0 |
| K06205 | 714.14  | -2.22 | 0.86 | 0 |
| K07153 | 714.14  | -2.22 | 0.86 | 0 |
| K05365 | 1428.03 | -2.22 | 0.85 | 0 |
| K05809 | 714.14  | -2.22 | 0.86 | 0 |
| K05803 | 714.14  | -2.22 | 0.86 | 0 |
| K03683 | 714.14  | -2.22 | 0.86 | 0 |
| K03748 | 727.48  | -2.21 | 0.85 | 0 |
| K00631 | 714.14  | -2.22 | 0.86 | 0 |
| K07724 | 677.07  | -2.35 | 0.90 | 0 |
| K03548 | 714.14  | -2.22 | 0.86 | 0 |
| K11991 | 714.14  | -2.22 | 0.86 | 0 |
| K07048 | 976.00  | -1.36 | 0.52 | 0 |
| K05787 | 714.14  | -2.22 | 0.86 | 0 |
| K06149 | 714.14  | -2.22 | 0.86 | 0 |
| K07235 | 714.14  | -2.22 | 0.86 | 0 |
| K07237 | 714.14  | -2.22 | 0.86 | 0 |
| K07236 | 714.14  | -2.22 | 0.86 | 0 |

|        |         |       |      |   |
|--------|---------|-------|------|---|
| K02504 | 714.14  | -2.22 | 0.86 | 0 |
| K02507 | 749.47  | -1.99 | 0.76 | 0 |
| K07062 | 1187.39 | -1.56 | 0.60 | 0 |
| K03804 | 714.14  | -2.22 | 0.86 | 0 |
| K09891 | 714.14  | -2.22 | 0.86 | 0 |
| K09899 | 714.14  | -2.22 | 0.86 | 0 |
| K07648 | 714.14  | -2.22 | 0.86 | 0 |
| K05873 | 474.06  | -2.65 | 1.02 | 0 |
| K03457 | 959.87  | -1.49 | 0.57 | 0 |
| K02851 | 714.14  | -2.22 | 0.86 | 0 |
| K00374 | 812.74  | -1.44 | 0.55 | 0 |
| K02682 | 714.14  | -2.22 | 0.86 | 0 |
| K08306 | 919.25  | -1.84 | 0.71 | 0 |
| K04774 | 714.14  | -2.22 | 0.86 | 0 |
| K02344 | 714.14  | -2.22 | 0.86 | 0 |
| K03633 | 714.14  | -2.22 | 0.86 | 0 |
| K09998 | 714.14  | -2.22 | 0.86 | 0 |
| K09999 | 714.14  | -2.22 | 0.86 | 0 |
| K03573 | 714.14  | -2.22 | 0.86 | 0 |
| K07735 | 1625.80 | -1.55 | 0.59 | 0 |
| K07751 | 714.14  | -2.22 | 0.86 | 0 |
| K04088 | 1646.91 | -0.93 | 0.36 | 0 |
| K07773 | 714.14  | -2.22 | 0.86 | 0 |
| K04691 | 714.14  | -2.22 | 0.86 | 0 |
| K10000 | 714.14  | -2.22 | 0.86 | 0 |
| K00247 | 714.14  | -2.22 | 0.86 | 0 |
| K02575 | 1329.43 | -1.46 | 0.56 | 0 |
| K03607 | 714.14  | -2.22 | 0.86 | 0 |
| K11066 | 686.68  | -2.50 | 0.95 | 0 |
| K05838 | 937.27  | -1.89 | 0.73 | 0 |
| K08223 | 620.81  | -2.00 | 0.77 | 0 |
| K00799 | 2655.13 | -1.89 | 0.73 | 0 |
| K03568 | 1428.47 | -1.50 | 0.58 | 0 |
| K14415 | 603.27  | -1.89 | 0.73 | 0 |
| K03592 | 1419.99 | -1.52 | 0.59 | 0 |
| K03646 | 787.58  | -1.83 | 0.71 | 0 |
| K00813 | 949.54  | -1.96 | 0.76 | 0 |
| K03230 | 666.03  | -2.43 | 0.95 | 0 |
| K03219 | 666.03  | -2.43 | 0.95 | 0 |
| K02444 | 1802.72 | -0.78 | 0.30 | 0 |
| K03580 | 934.53  | -1.88 | 0.74 | 0 |
| K03087 | 750.06  | -2.31 | 0.90 | 0 |
| K11607 | 706.75  | -2.22 | 0.86 | 0 |
| K11606 | 706.75  | -2.22 | 0.86 | 0 |
| K11605 | 706.75  | -2.22 | 0.86 | 0 |
| K11604 | 706.75  | -2.22 | 0.86 | 0 |



|        |         |       |      |   |
|--------|---------|-------|------|---|
| K12150 | 664.67  | -2.44 | 0.95 | 0 |
| K02298 | 666.03  | -2.43 | 0.95 | 0 |
| K02299 | 666.03  | -2.43 | 0.95 | 0 |
| K02297 | 666.03  | -2.43 | 0.95 | 0 |
| K01112 | 664.67  | -2.44 | 0.95 | 0 |
| K03184 | 706.75  | -2.22 | 0.86 | 0 |
| K03181 | 708.00  | -2.21 | 0.86 | 0 |
| K02300 | 666.03  | -2.43 | 0.95 | 0 |
| K03651 | 934.53  | -1.88 | 0.74 | 0 |
| K03228 | 666.03  | -2.43 | 0.95 | 0 |
| K03229 | 666.03  | -2.43 | 0.95 | 0 |
| K03226 | 666.03  | -2.43 | 0.95 | 0 |
| K03227 | 666.03  | -2.43 | 0.95 | 0 |
| K03224 | 666.03  | -2.43 | 0.95 | 0 |
| K13735 | 664.67  | -2.44 | 0.95 | 0 |
| K07121 | 934.52  | -1.91 | 0.74 | 0 |
| K04770 | 933.33  | -1.91 | 0.74 | 0 |
| K03690 | 708.00  | -2.21 | 0.86 | 0 |
| K03835 | 828.84  | -1.88 | 0.73 | 0 |
| K02819 | 1150.70 | -1.09 | 0.42 | 0 |
| K03490 | 701.88  | -1.52 | 0.59 | 0 |
| K11743 | 1477.90 | -1.32 | 0.52 | 0 |
| K07687 | 667.21  | -2.42 | 0.95 | 0 |
| K02858 | 782.65  | -1.84 | 0.72 | 0 |
| K03414 | 565.24  | -2.43 | 0.95 | 0 |
| K01716 | 930.42  | -1.92 | 0.75 | 0 |
| K03317 | 904.66  | -1.63 | 0.64 | 0 |
| K08357 | 569.08  | -2.30 | 0.90 | 0 |
| K00989 | 2380.12 | -0.84 | 0.33 | 0 |
| K03320 | 2491.62 | -0.95 | 0.37 | 0 |
| K05590 | 927.68  | -1.92 | 0.76 | 0 |
| K09902 | 927.68  | -1.92 | 0.76 | 0 |
| K03645 | 927.68  | -1.92 | 0.76 | 0 |
| K07400 | 927.68  | -1.92 | 0.76 | 0 |
| K02062 | 929.42  | -1.91 | 0.75 | 0 |
| K02679 | 927.68  | -1.92 | 0.76 | 0 |
| K08312 | 927.68  | -1.92 | 0.76 | 0 |
| K03586 | 929.03  | -1.91 | 0.76 | 0 |
| K03764 | 927.68  | -1.92 | 0.76 | 0 |
| K08162 | 559.45  | -2.00 | 0.79 | 0 |
| K03528 | 927.68  | -1.92 | 0.76 | 0 |
| K02521 | 718.33  | -2.17 | 0.86 | 0 |
| K02560 | 927.68  | -1.92 | 0.76 | 0 |
| K07662 | 927.68  | -1.92 | 0.76 | 0 |
| K09897 | 927.68  | -1.92 | 0.76 | 0 |
| K09893 | 927.68  | -1.92 | 0.76 | 0 |

|        |         |       |      |   |
|--------|---------|-------|------|---|
| K09892 | 927.68  | -1.92 | 0.76 | 0 |
| K09911 | 927.68  | -1.92 | 0.76 | 0 |
| K03674 | 927.68  | -1.92 | 0.76 | 0 |
| K05851 | 927.68  | -1.92 | 0.76 | 0 |
| K06957 | 927.68  | -1.92 | 0.76 | 0 |
| K02680 | 927.68  | -1.92 | 0.76 | 0 |
| K07122 | 929.03  | -1.91 | 0.76 | 0 |
| K03632 | 797.96  | -2.14 | 0.84 | 0 |
| K03597 | 929.03  | -1.91 | 0.76 | 0 |
| K03591 | 927.68  | -1.92 | 0.76 | 0 |
| K01713 | 43.61   | -1.75 | 0.69 | 0 |
| K07479 | 927.68  | -1.92 | 0.76 | 0 |
| K01608 | 690.58  | -1.56 | 0.61 | 0 |
| K07184 | 927.68  | -1.92 | 0.76 | 0 |
| K02839 | 559.45  | -2.00 | 0.79 | 0 |
| K06145 | 930.23  | -1.91 | 0.75 | 0 |
| K06899 | 929.35  | -1.91 | 0.76 | 0 |
| K09997 | 733.60  | -2.15 | 0.85 | 0 |
| K02199 | 1004.34 | -1.79 | 0.71 | 0 |
| K01218 | 1516.65 | 1.30  | 0.52 | 0 |
| K09136 | 1041.99 | -1.55 | 0.62 | 0 |
| K03598 | 1013.12 | -1.88 | 0.75 | 0 |
| K06905 | 1843.96 | -1.10 | 0.44 | 0 |
| K02779 | 1227.07 | -1.16 | 0.47 | 0 |
| K02505 | 737.73  | -2.04 | 0.82 | 0 |
| K11179 | 767.13  | -1.86 | 0.75 | 0 |
| K11905 | 475.32  | -2.69 | 1.08 | 0 |
| K03658 | 562.44  | -1.96 | 0.79 | 0 |
| K00325 | 786.81  | -1.80 | 0.73 | 0 |
| K00230 | 1060.14 | -1.43 | 0.58 | 0 |
| K03834 | 743.74  | -2.11 | 0.85 | 0 |
| K11895 | 476.52  | -2.67 | 1.08 | 0 |
| K11892 | 476.52  | -2.67 | 1.08 | 0 |
| K11891 | 476.52  | -2.67 | 1.08 | 0 |
| K01093 | 737.85  | -1.96 | 0.79 | 0 |
| K11894 | 474.48  | -2.68 | 1.09 | 0 |
| K11910 | 474.48  | -2.68 | 1.09 | 0 |
| K01816 | 847.43  | -1.74 | 0.71 | 0 |
| K11737 | 474.48  | -2.68 | 1.09 | 0 |
| K07266 | 935.74  | -1.35 | 0.55 | 0 |
| K07265 | 935.74  | -1.35 | 0.55 | 0 |
| K06995 | 468.26  | -2.68 | 1.09 | 0 |
| K07071 | 877.41  | -1.75 | 0.71 | 0 |
| K12137 | 68.68   | 1.52  | 0.62 | 0 |
| K13542 | 7329.45 | 0.42  | 0.17 | 0 |
| K07789 | 475.68  | -2.66 | 1.09 | 0 |

|        |         |       |      |   |
|--------|---------|-------|------|---|
| K07788 | 475.68  | -2.66 | 1.09 | 0 |
| K11214 | 478.08  | 1.02  | 0.42 | 0 |
| K03089 | 1566.89 | -1.34 | 0.55 | 0 |
| K02509 | 619.64  | -1.66 | 0.68 | 0 |
| K11747 | 957.45  | -1.85 | 0.76 | 0 |
| K09800 | 1538.24 | -1.35 | 0.56 | 0 |
| K02821 | 1579.14 | -1.17 | 0.48 | 0 |
| K11893 | 483.30  | -2.57 | 1.07 | 0 |
| K02022 | 1365.53 | -1.34 | 0.56 | 0 |
| K08358 | 652.98  | -2.18 | 0.91 | 0 |
| K05966 | 758.99  | -1.65 | 0.69 | 0 |
| K08304 | 1496.37 | -1.41 | 0.59 | 0 |

---



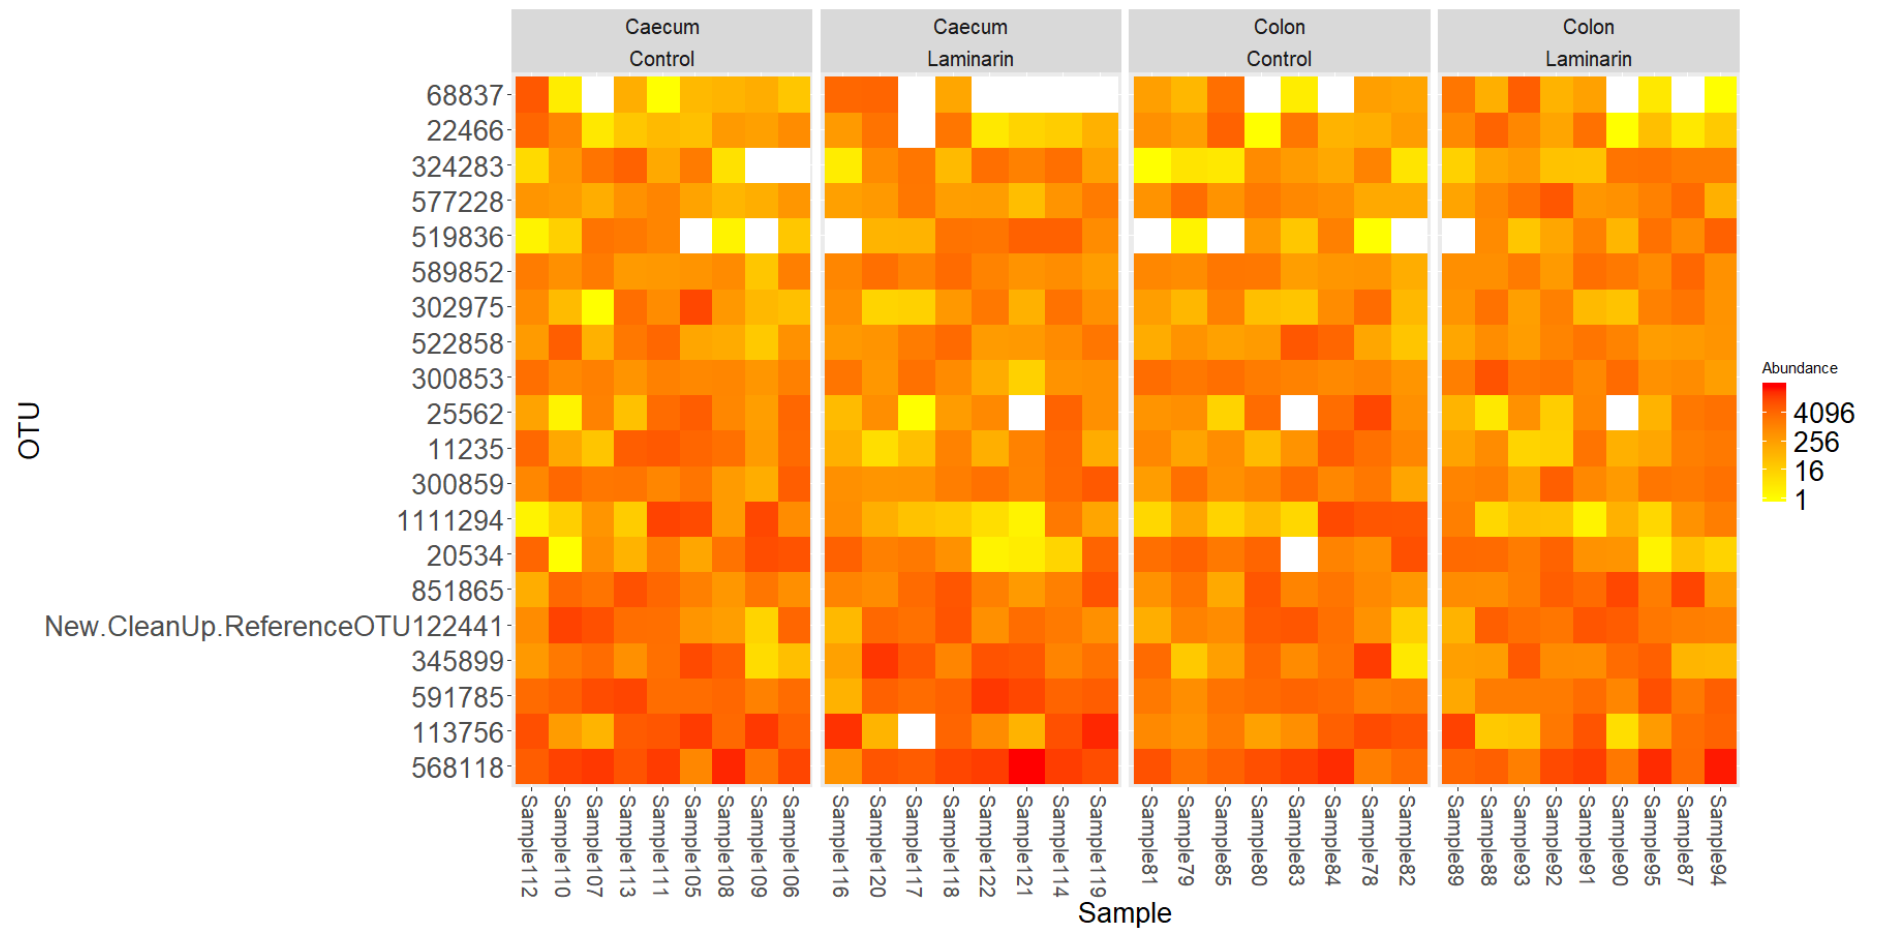

Figure S2: Heatmap showing the top 20 most abundant OTUs

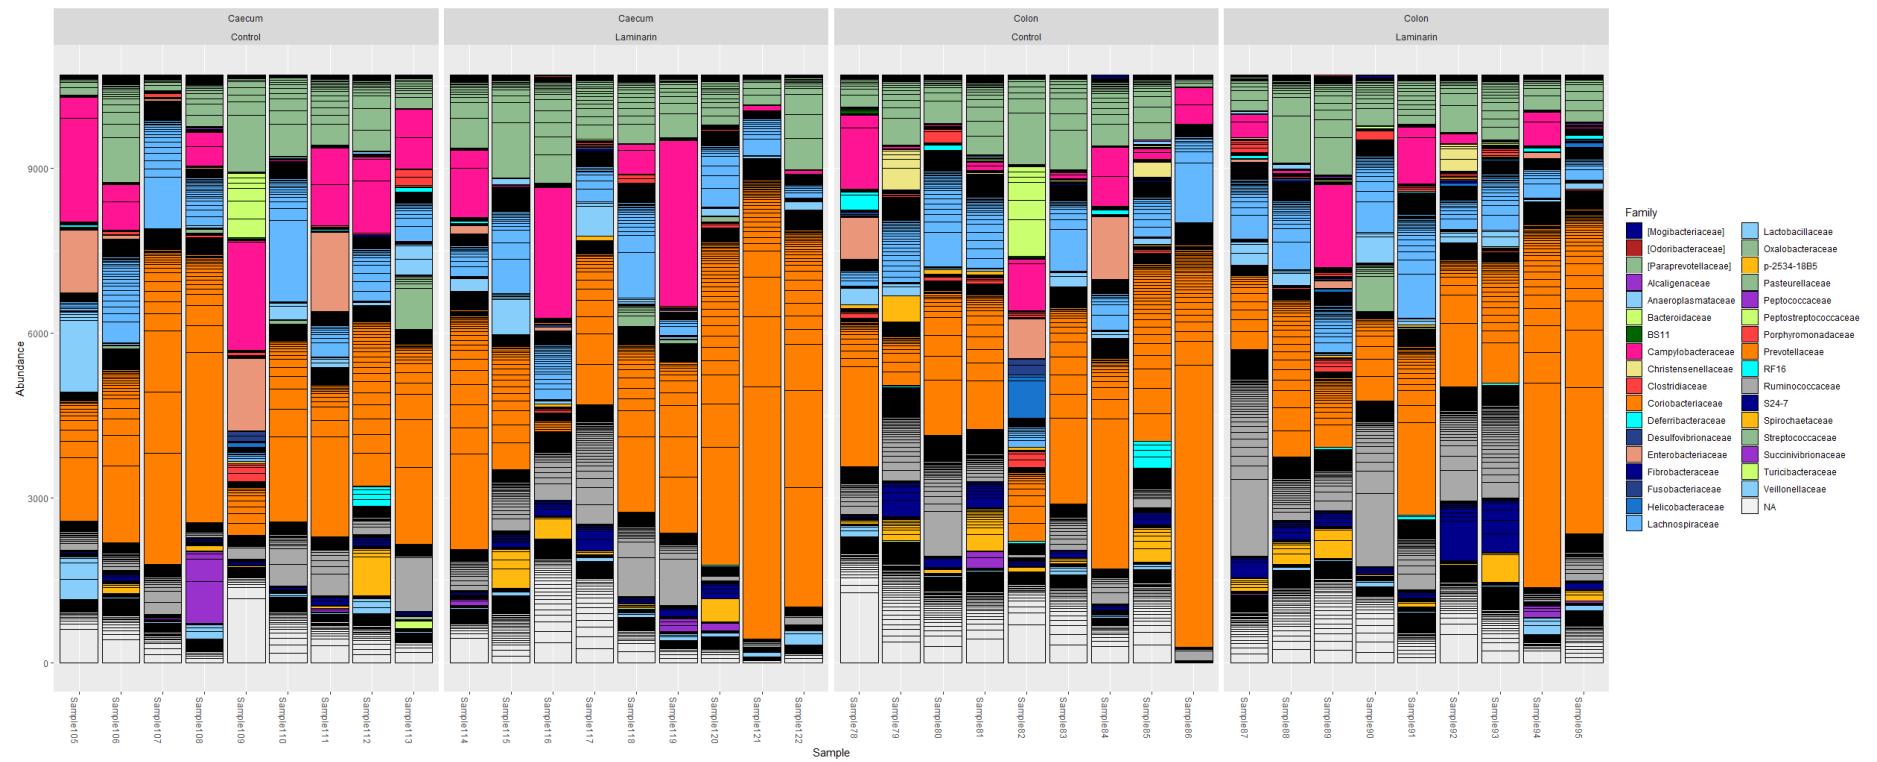

Figure S3: Taxonomic distribution of individual samples at family level
